# Supplementary material for: Research-Tested Mobile Apps for Breast Cancer Care: Systematic Review
Source: PubMed Central journal article supplement (PMC6388100; doi:10.2196/10930), 2019-02-11
Supplement: mhealth_v7i2e10930_app1.pdf [file mhealth_v7i2e10930_app1.pdf]

Appendix 1. Description of the characteristics of the studies presented in the review.

| Intervention category | Authors and year           | Country     | Study design             | Intervention target                                                                                                                                                           | Sample size       | Participant characteristics                                                                                               | Duration and follow-up                 | Intervention components                                                                                                                                                                                                                              | Outcome measures                                                        | Results                                                                                                                                                                                                                                                                                          | Quality of the study <sup>1</sup> |
|-----------------------|----------------------------|-------------|--------------------------|-------------------------------------------------------------------------------------------------------------------------------------------------------------------------------|-------------------|---------------------------------------------------------------------------------------------------------------------------|----------------------------------------|------------------------------------------------------------------------------------------------------------------------------------------------------------------------------------------------------------------------------------------------------|-------------------------------------------------------------------------|--------------------------------------------------------------------------------------------------------------------------------------------------------------------------------------------------------------------------------------------------------------------------------------------------|-----------------------------------|
| Prevention            | Hartman et al. [22] (2016) | USA         | RCT                      | Weight loss                                                                                                                                                                   | Intervention N=36 | Women age 40–75 years with increased risk of breast cancer (Gail Model score $\geq$ 1.7) or previous                      | 6 months                               | Combined technology-based self-monitoring tools with individualized phone calls                                                                                                                                                                      | Weight and accelerometer-measured physical activity                     | At 6 months, intervention participants had lost significantly more weight (4.4 kg VS 0.8 kg, $p<0.01$ ) and a                                                                                                                                                                                    | Strong                            |
|                       | Eden et al. [23] (2015)    | USA         | Prospective cohort study | To help women in their forties to gain deeper insights into their priorities for screening and prepare them to discuss mammography screening with their health care providers | Usual 75          | Women age 40–49 years with no known high or moderate risk for breast cancer and no mammography during the previous year   | Before and after use of app (same day) | The decision aid ( <i>Mammopad</i> ) included educational modules on breast cancer, mammography, risk assessment, and priority setting about screening                                                                                               | Decisional conflict, Decision Self-efficacy scale                       | Less decisional conflict, and on all subscales ( $p<0.01$ ), increased decisional self-efficacy mean scores ( $p<0.01$ ), different screening intentions (19%) but not significant.                                                                                                              | Moderate                          |
|                       | Heo et al. [24] (2013)     | Korea       | Prospective cohort study | To encourage breast self-examination                                                                                                                                          | 45                | Women aged $\geq$ 19 years with no history of breast cancer and own a smartphone.                                         | Before and after use of app            | A smartphone application developed with functions including a breast self-examination date alarm, a reminder to encourage mother and daughter to practice breast self-examination together, record keeping, and educational content with video clips | Survey: increased breast self-examination                               | An increase from 28 to 32 women who did breast self-examination ( $p<0.5$ ), subgroups: $\geq$ 30 years of age increased from 36.4% to 81.8% ( $p<0.05$ ), breast self-examination during optimal time increased (2.2% to 33.3%, $p<0.01$ ), 8% detected abnormal mass leading to hospital visit | Weak                              |
| Early detection       | Egbring et al. [25] (2016) | Switzerland | RCT                      | Collection of patient-reported daily functional activity                                                                                                                      | Controls N=41     | Women aged $\geq$ 18 years, with early breast cancer initiating adjuvant or neoadjuvant chemotherapy and own a smartphone | 3 visits                               | Mobile and Web app to record daily functional activity and adverse events: Patients could report daily functional activity or symptoms with indication of                                                                                            | Functional activity, Eastern cooperative oncology group scoring, common | Daily functional activity declined from the first to third visit for C and the E1(app) group ( $p<0.05$ ) but not in the E2 (app and physician) ( $p>0.05$ ) questionnaire                                                                                                                       | Strong                            |

<sup>1</sup>The quality of the study was rated with the EPHPP Quality Assessment Tool for Quantitative Studies [19] and the Joanna Briggs Institute Critical Appraisal Checklist for Qualitative Research [20].
